# Supplementary material
Source: ML conference proceedings conference paper supplement (https://openaccess.thecvf.com/content/ICCV2023/html/Lee_Camera-Driven_Representation_Learning_ICCV_2023_paper.html)
Supplement: Supplementary file 1 [file Lee_Camera-Driven_Representation_Learning_ICCV_2023_supplemental.pdf]

# Camera-Driven Representation Learning for Unsupervised Domain Adaptive Person Re-identification - Supplementary materials

Geon Lee<sup>1</sup> Sanghoon Lee<sup>1</sup> Dohyung Kim<sup>1</sup> Younghoon Shin<sup>2</sup> Yongsang Yoon<sup>2</sup> Bumsub Ham<sup>1\*</sup>

<sup>1</sup>Yonsei University <sup>2</sup>Robotics Lab, Hyundai Motor Company

In the supplementary material, we present training cost comparisons (Sec. S1), training epochs (Sec. S2), results for IBN-ResNet50 (Sec. S3), qualitative results (Sec. S4), and detailed descriptions for setting hyperparameters (Sec. S5).

## S1. Training cost comparisons

To demonstrate the efficiency of our approach, we compare the training cost with the state of the art [1, 3]. We measure GPU memory consumption during training and total training hours on MSMT17 [2]-to-Market1501 [4], and present the results in Table S1. For a fair comparison, we average the numbers over 10 executions using the official implementations provided by the authors<sup>1</sup>, on the same machine with 4 Geforce RTX 2080Ti GPUs. Our approach offers faster training while using less GPU memory, because it does not employ multiple reID models [3], or explicitly generate more features [1], while outperforming them for all cases (Tables 1 and 2). Note that IDM even updates pseudo labels more frequently to maximize the performance.

## S2. Training epochs

Our model is trained with 4 epochs for each curriculum stage, except for the final one with 30 epochs. Namely, the total number of epochs is  $4(C - 1) + 30$ , where  $C$  is the number of cameras in a target domain. We use a half of target images on average for each stage, except for the final one with all images. The number of iterations is thus represented as  $(2C - 2)\lceil \frac{N}{B} \rceil + 30\lceil \frac{N}{B} \rceil$ , where  $N$  and  $B$  are the number of target images and the batch size, respectively. The number of iterations for IDM [1] and UNRN [3] is  $50\lceil \frac{N}{B} \rceil$ , as they use 50 epochs with all target images for entire stages. If  $C$  is smaller than 11, *e.g.*, Market1501 [4]

\*Corresponding author

<sup>1</sup>We directly adopt official codes from <https://github.com/zkcys001/UDAStrongBaseline> and <https://github.com/SikaStar/IDM> for UNRN [3] and IDM [1], respectively.

Table S1: Quantitative comparisons of ours, UNRN [3], and IDM [1] in terms of GPU memory consumption and training hours.

| Methods  | GPU memory  | Training hours   |
|----------|-------------|------------------|
| Ours     | <b>27GB</b> | <b>3.2 hours</b> |
| UNRN [3] | 29GB        | 4.3 hours        |
| IDM [1]  | 54GB        | 6.8 hours        |

captured by 6 cameras, ours uses fewer iterations than IDM and UNRN. It requires more iterations for MSMT17 [2] with 15 cameras.

## S3. Results for IBN-ResNet50

We have adopted IBN-ResNet50 as a backbone network, following IDM [1], and obtain the result on Market1501 [4]-to-MSMT17 [2]. Our model outperforms the IDM counterpart by 2.9% and 2.1% in terms of mAP and rank-1, respectively, demonstrating the effectiveness of our approach for UDA reID.

## S4. Qualitative results

We provide in Fig. S1 additional visual comparisons of retrieval results among variants of our model on MSMT17 [2]-to-Market1501 [4], and Market1501-to-MSMT17. We can see that the baseline model is distracted by different persons with, *e.g.*, illumination (top-left), and similar pose (bottom-left). On the contrary, our model is able to offer person representations that are robust to various intra-class variations, and successfully retrieves person images with the same ID as a query person.

## S5. Hyperparameters

We mainly adopt hyperparameter settings from recent works [1, 3] (*e.g.*, batch size, learning rate, and momen-

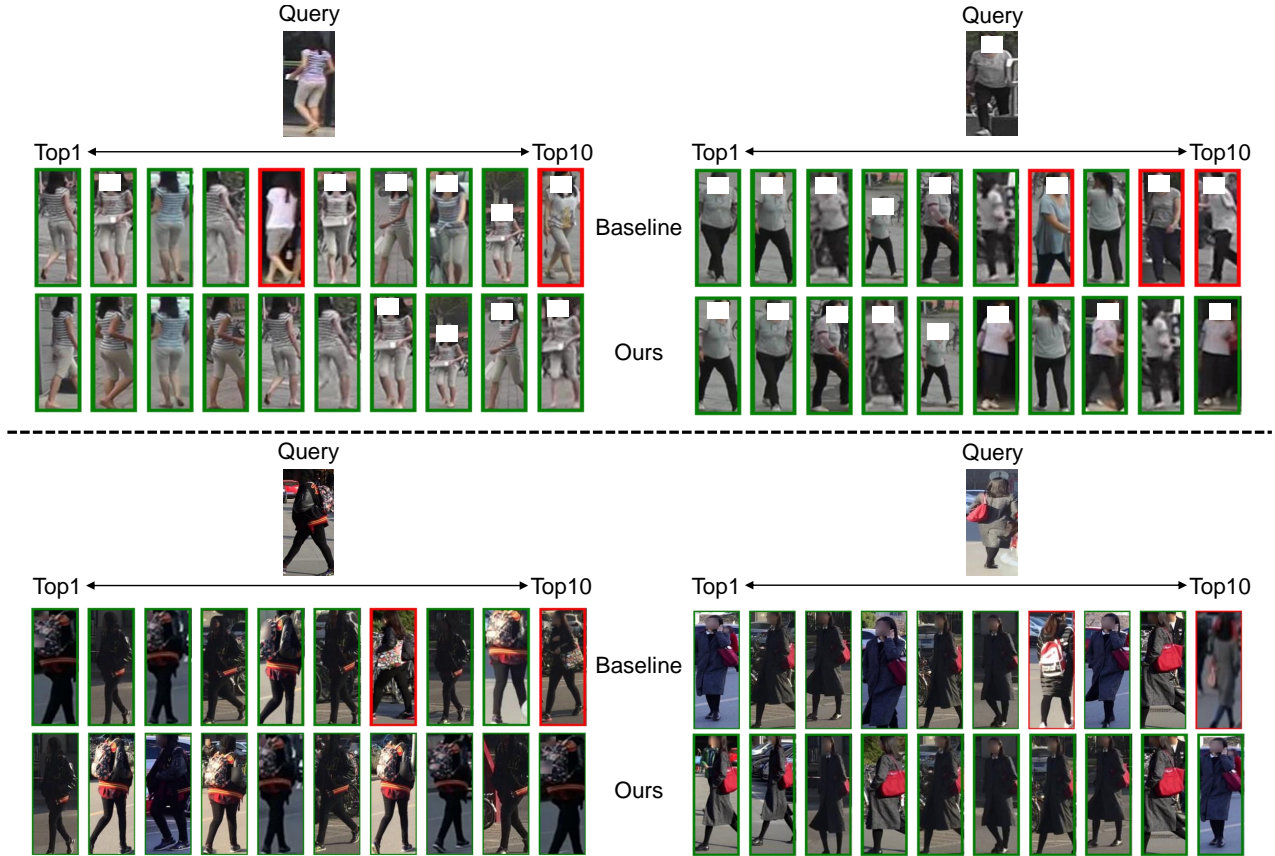

Figure S1: Visual comparisons of retrieval results on MSMT17 [2]-to-Market1501 [4] (top) and Market1501-to-MSMT17 (bottom). Results with green boxes have the same identity as the query, while those with red boxes do not. (Best viewed in color.)

Table S2: Quantitative comparisons for the hyperparameter  $\epsilon_{\text{init}}$  and  $M_{\text{int}}$ . Numbers in bold indicate the best performance and underscored ones indicate the second best.

| $\epsilon_{\text{init}}$ | rank-1 (%)        | mAP (%)           |
|--------------------------|-------------------|-------------------|
| 0.3                      | <u>70.2 ± 1.5</u> | 45.1 ± 1.0        |
| 0.4                      | <b>71.1 ± 1.0</b> | <b>46.3 ± 0.5</b> |
| 0.5                      | 70.1 ± 0.8        | 44.9 ± 1.1        |
| $M_{\text{int}}$         | rank-1 (%)        | mAP (%)           |
| 1                        | <u>71.0 ± 0.4</u> | 46.1 ± 0.4        |
| 3                        | <b>71.1 ± 0.5</b> | <b>46.3 ± 0.3</b> |
| 5                        | 69.2 ± 1.0        | 44.5 ± 0.2        |

tum value for an EMA update), except for cluster density threshold  $\epsilon$  for the DBSCAN algorithm and the frequency of updating pseudo labels  $M_{\text{int}}$ . We randomly split 1041 training IDs in MSMT17 [2] into 841 and 200 IDs for training and validation, respectively, and perform cross-validation on Market1501 [4]-to-MSMT17 [2]. We set the threshold value to  $\epsilon_{\text{init}}$  during the initial curriculum stage, and linearly increase the value at each stage, up to 0.6 at the final

stage. This is consistent with recent works [1, 3] that set  $\epsilon$  to 0.6 for training with all target images. We perform a grid search for the initial density threshold  $\epsilon_{\text{init}}$  over values in  $\{0.2, 0.3, 0.4, 0.5\}$ . We perform a grid search for  $M_{\text{int}}$  over  $\{1, 3, 5\}$ . We adopt the corresponding  $\epsilon_{\text{init}}$  and  $M_{\text{int}}$  values across all settings and scenarios. We provide in Table S2 the results for various  $\epsilon_{\text{init}}$  and  $M_{\text{int}}$  values.

## References

- [1] Yongxing Dai, Jun Liu, Yifan Sun, Zekun Tong, Chi Zhang, and Ling-Yu Duan. IDM: An intermediate domain module for domain adaptive person re-id. In *ICCV*, 2021.
- [2] Longhui Wei, Shiliang Zhang, Wen Gao, and Qi Tian. Person transfer GAN to bridge domain gap for person re-identification. In *CVPR*, 2018.
- [3] Kecheng Zheng, Cuiling Lan, Wenjun Zeng, Zhizheng Zhang, and Zheng-Jun Zha. Exploiting sample uncertainty for domain adaptive person re-identification. In *AAAI*, 2021.
- [4] Liang Zheng, Liyue Shen, Lu Tian, Shengjin Wang, Jingdong Wang, and Qi Tian. Scalable person re-identification: A benchmark. In *ICCV*, 2015.
